# Supplementary material for: Predicting the Path of Technological Innovation: SAW vs. Moore, Bass, Gompertz, and Kryder
Source: Atypon-hosted journal article supplement (doi:10.1287/mksc.1120.0739), 2012-11-01
Supplement: mksc.1120.0739-sm-online-appendix.pdf [file mksc.1120.0739-sm-online-appendix.pdf]

## Online Appendix A: Supplementary Figures

### Figure A1: Hypothesized Paths of Technological Evolution

Figure A1a: Exponential curve representing the Moore's and Kryder's Law

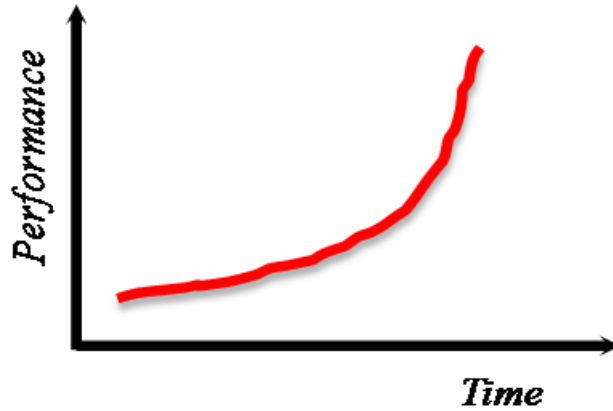

Figure A1b: Sigmoid curve representing the Logistic, Bass and Gompertz Law

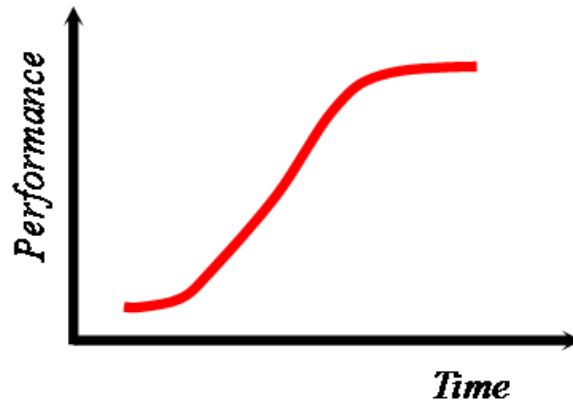

Figure A1c: Step functions representing the Gupta, Tobit II, and SAW models

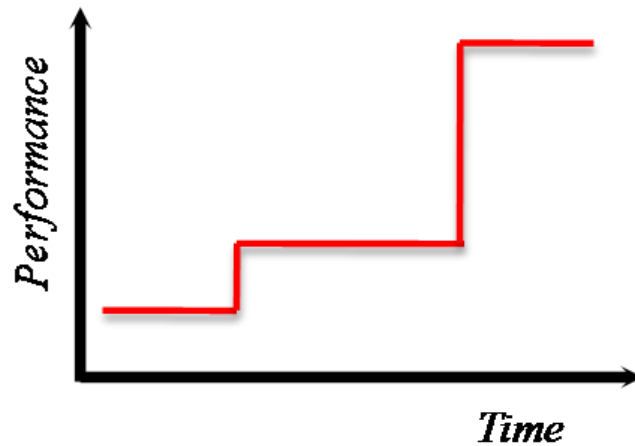

### Figure A2: Experimental Setup

Figure A2a: Sampling of Technologies and Time Periods For Prediction

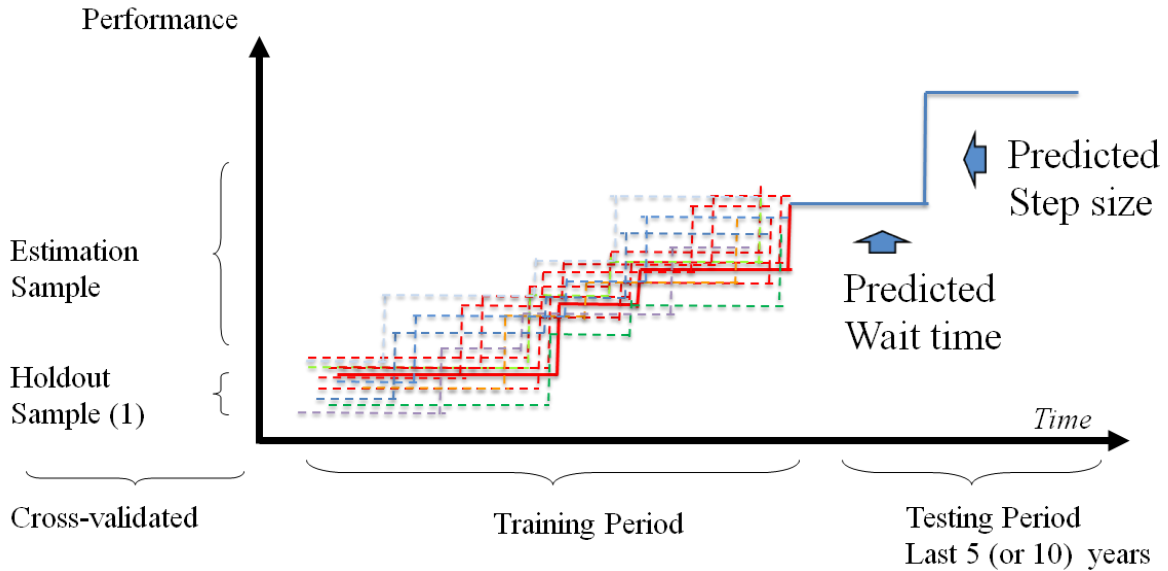

Figure A2b: Unconstrained Fits

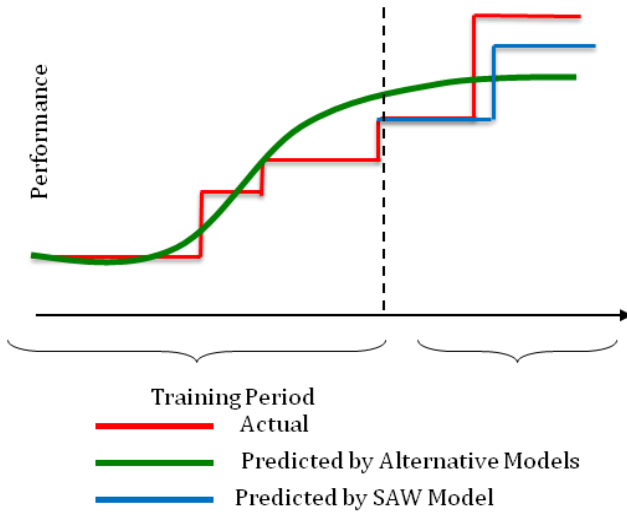

Figure A2c: Constrained Fits

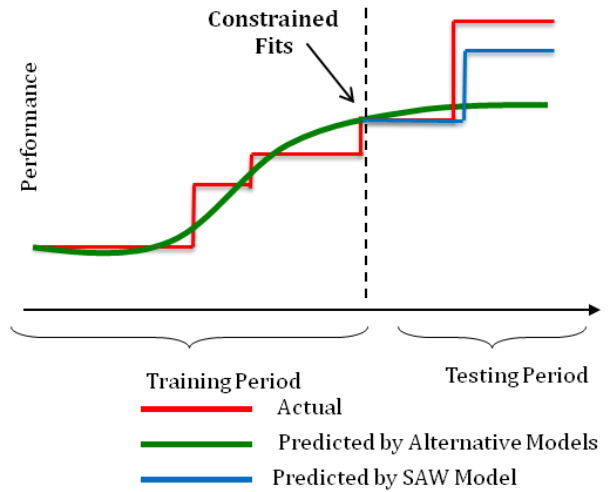

### Figure A3: Estimated Parameters (Step Size and Wait Time)

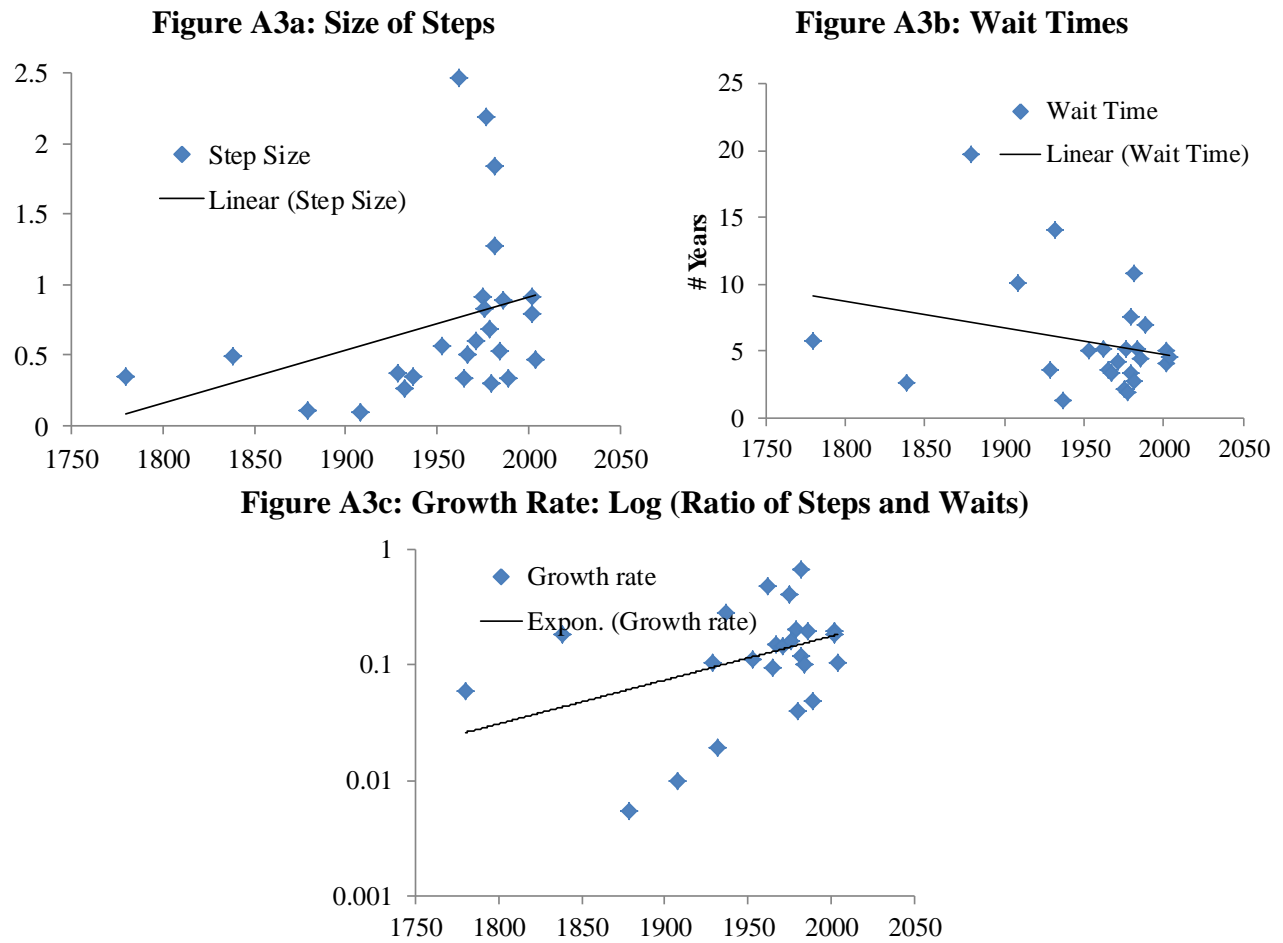

## Online Appendix B:

### Prediction and Fitting of Comparison Models

In their standard forms, Moore's law, Kryder's law and the logistic, Bass, and Gompertz model do not directly incorporate covariates into their predictions. In order to provide a comparison with SAW, which does allow for the inclusion of covariates, we fit two modified versions of these methods. In the first implementation we used a non-linear mixed effects model which fit the standard functional forms of each method but modeled the various parameters as random effects coming from a Gaussian distribution. The parameters for the Gaussian distribution were estimated using all technologies simultaneously and hence built strength in a similar fashion to SAW. Our second implementation of these methods also modeled the parameters using a random effects formulation but in addition incorporated the covariates as a multiplicative adjustment to the original prediction using (11). Next, we discuss both the *Mixed Effects Model* and the *Mixed Effects Model with Covariate Effects* for each method. By comparison the Gupta and Tobit II models involve covariates so must be fit to all curves simultaneously to estimate the population level covariate coefficients.

#### ***Extensions of Moore's Law and Kryder's Law (Exponential Model)***

##### **Mixed Effects Model**

Moore's Law and Kryder's Law each state that the rate of change in the performance of a technology is exponential with given constants. Thus, if we model performance of the technology as an exponential function of time, the coefficient of time represents the constant rate at which the technology improves. To test the applicability of Moore's Law and Kryder's Law, we model the relationship between time and technology performance using the following exponential function:

$$(14) \quad P_{ij} = \tau_{i1} e^{\tau_{i2} t_{ij}} e^{\epsilon_{ij}}$$

where,  $P_{ij}$  is performance for technology  $i$  at time  $t_{ij}$ , and  $\tau_{i1}$  and  $\tau_{i2}$  are modeled as random variables coming from Gaussian distributions.

We estimate the coefficients for the exponential model associated with Moore's Law and Kryder's Law using linear mixed effects software applied to the log-transformed data. Kryder's Law assumes  $\tau_2 = \frac{12}{13} \log 2$  while Moore's Law assumes  $\tau_2 = \frac{12}{18} \log 2$ . After fitting the mixed effects model to each technology we use the fitted parameters to form predictions and compare the estimate for  $\tau_{i2}$  with that predicted by Kryder's and Moore's Laws.

### **Mixed Effects Model with Covariate Effects**

Let  $X_{ij1}, X_{ij2}, \dots, X_{ijq}$  represent  $q$  different covariates measured at time  $t_{ij}$ . We incorporate these covariates into the exponential model in a multiplicative fashion using the following formulation,

$$(15) \quad P_{ij} = \tau_{i1} e^{\tau_{i2} t_{ij}} \times \exp(\beta_0 + \sum_{k=1}^q \beta_k X_{ijk}) e^{\epsilon_{ij}}, \quad \tau_{i1} \sim N(\mu_1, \sigma_1^2), \quad \tau_{i2} \sim N(\mu_2, \sigma_2^2)$$

Note that the parameter  $\tau_{i1}$  are modeled as random effects because they are specific to a particular technology but the  $\beta$  coefficients are treated as fixed effects because they are common to all technologies.

### **Extensions of Logistic Model**

#### **Mixed Effects Model**

The generalized form of the logistic curve is a relatively flexible model that can also capture an S-shape of the path of technological evolution. This model has been widely used in prior literature (e.g. Young 1993; Meade and Islam 1998).

$$(16) \quad P_{ij} = \frac{\tau_{i3}}{1 + \tau_{i4} \times \exp(-\tau_{i5} t)} e^{\epsilon_{ij}}$$

where,  $P_{ij}$  is the performance of technology  $i$  at time  $t_{ij}$ , and  $\tau_3, \tau_4$  and  $\tau_5$  are modeled as random variables coming from Gaussian distributions.

We fit equation (16) using non-linear mixed effects software applied to the log-transformed data.

### **Mixed Effects Model with Covariate Effects**

We incorporate the covariates into the logistic model using a multiplicative formulation, thus

$$(17) \quad P_{ij} = \frac{\tau_{i3}}{1 + \tau_{i4} \times \exp(-\tau_{i5} t_{ij})} \times \exp(\beta_0 + \sum_{k=1}^q \beta_k X_{ijk}) e^{\epsilon_{ij}}$$

Note that the parameters  $\tau_{31}, \tau_{i4}, \tau_{i5}$  are modeled as random effects because they are specific to a particular technology but the  $\beta$  coefficients are treated as fixed effects because they are common to all technologies.

### ***Extensions of Bass Model***

#### **Mixed Effects Model**

The Bass model (Bass 1969) is a special case of the Gamma/shifted-Gompertz distribution that can capture an S-shape plus a variety of other shapes that approximate the S-curve depending on the values of the parameters. We use the operational form of the Bass model used previously for modeling technology evolution (Young and Ord 1989; Young 1993):

$$(18) \quad p_{ij} = (\tau_{i6} + \tau_{i7} P_{ij} + \tau_{i8} P_{ij}^2) e^{\epsilon_{ij}}$$

where,  $P_{ij}$  is the performance of technology  $i$  at time  $t_{ij}$ ,

$p_{ij}$  is marginal performance improvement at time  $t_{ij}$ ,

$\tau_{i6}, \tau_{i7}$  and  $\tau_{i8}$  are modeled as random variables coming from a Gaussian distribution. We fit equation (18) using non-linear mixed effects software applied to the log-transformed data.

### Mixed Effects Model with Covariate Effects

We incorporate the covariates into the Bass model using a multiplicative formulation, thus:

$$(19) \quad p_{ij} = (\tau_{i6} + \tau_{i7}P_{ij} + \tau_{i8}P_{ij}^2) \times \exp\left(\beta_0 + \sum_{k=1}^q \beta_k X_{ijk}\right) e^{\epsilon_{ij}}$$

Note that the parameters  $\tau_{i6}, \tau_{i7}, \tau_{i8}$  are modeled as random effects because they are specific to a particular technology but the  $\beta$  coefficients are treated as fixed effects because they are common to all technologies.

### Extensions of Gompertz' Model

#### Mixed Effects Model

The Gompertz' Model used to estimate Gompertz' Law takes the functional form:

$$(20) \quad P'_{ij} = rP_{ij} \log \frac{K}{P_{ij}}$$

Where,  $P_{ij}$  is the performance of technology  $i$  at time  $t_{ij}$ ,

$P'_{ij}$  is the corresponding derivative of the performance,

$r$  is the intrinsic growth rate,

$K$  is the final technology level.

Notice that this equation gives slow growth when  $P_{ij}$  is either low or close to  $K$ , and rapid growth in between. The solution to this differential equation is the following double exponential function:

$$(21) \quad P_{ij} = \tau_{i9} \exp(-\tau_{i10} e^{-\tau_{i11} t_{ij}}) e^{\epsilon_{ij}}$$

where  $\tau_9$ ,  $\tau_{10}$  and  $\tau_{11}$  are modeled as random variables coming from a Gaussian distribution. We fit equation (21) using non-linear mixed effects software applied to the log-transformed data.

### **Mixed Effects Model with Covariate Effects**

We incorporate the covariates into the Gompertz model using a multiplicative formulation, thus:

$$(22) \quad P_{ij} = \tau_{i9} \exp(-\tau_{i10} e^{-\tau_{i11} t_{ij}}) \times \exp\left(\beta_0 + \sum_{k=1}^q \beta_k X_{ijk}\right) e^{\epsilon t}$$

Note that the parameters  $\tau_{i9}$ ,  $\tau_{i10}$ ,  $\tau_{i11}$  are modeled as random effects because they are specific to a particular technology but the  $\beta$  coefficients are treated as fixed effects because they are common to all technologies.

### **Constrained Parameters**

Several of the parameters in the above mentioned models are constrained to be positive. To operationalize this constraint we parameterized the corresponding coefficients as  $\tau = \exp(\tau^*)$  where  $\tau^*$  was modeled as coming from a Gaussian distribution. This formulation ensured that  $\tau$  would always be positive.

### **Extensions of Gupta Model**

The interpurchase time model uses an Erlang-2 distribution to model the time until a purchase, or in our case wait time until a jump in technology, with the Erlang parameter modeled as a function of a set of explanatory variables. Specifically,

$$(23) \quad f_{ij}(t) = \alpha_{ij}^2 t \exp(-\alpha_{ij} t)$$

$$(24) \quad \alpha_{ij} = \exp(-\delta_0 - \delta_1 X_{ij1} - \dots - \delta_p X_{ijp})$$

where  $f_{ij}(t)$  is the probability density, at time  $t_{ij}$ , of the wait until the next jump for technology  $i$ ,  $\alpha_{ij}$  is the Erlang-2 scale parameter and  $X_{ijk}$  is the  $k$ th covariate at  $t_{ij}$ . The time until purchase, or technology jump, is predicted using the Erlang-2 mean,  $\frac{2}{\alpha_{ij}}$ .

Gupta (1988) models the purchase quantity using a logistic distribution because his sales data is categorical in terms of size e.g. 16 oz, 32 oz, etc. However, our jump size data is continuous so we follow Gupta (1988)'s recommendation to model such data using a standard linear regression, with explanatory variables  $Y_{ij1}, Y_{ij2}, \dots, Y_{ijq}$ . Consistent with our other comparison models, we use the log transformed jump size as the dependent variable.

The interpurchase time and purchase quantity models are fit separately. The interpurchase time model is fit using an iterative reweighted least squares algorithm that maximizes the likelihood function associated with the Erlang-2 distribution. The purchase quantity model is fit using a standard linear regression least squares procedure with the log transformed jumps as the dependent variable and the values of the covariates at the associated time points as the independent variables. Combining the interpurchase time model, which predicts time until the next jump, with the purchase quantity model, which predicts jump size, we can use the explanatory variables to estimate the remaining evolution for any given technology.

### ***Tobit II Model***

For the  $i^{\text{th}}$  technology, at time  $t_{ij}$ , Tobit II models the probability of a step ( $P_1^*$ ) as a function of explanatory variables  $X_{ij1}, X_{ij2}, \dots, X_{ijp}$ , and the size of the step ( $P_2^*$ ) as a function of explanatory variables  $Y_{ij1}, Y_{ij2}, \dots, Y_{ijq}$  thus:

$$(25) \quad P_{1ij}^* = \frac{e^{\delta_0 + \delta_1 X_{ij1} + \dots + \delta_p X_{ijp}}}{1 + e^{\delta_0 + \delta_1 X_{ij1} + \dots + \delta_p X_{ijp}}} + U_{ij}$$

$$(26) \quad P_{2ij}^* = \chi_0 + \chi_1 Y_{ij1} + \cdots + \chi_q Y_{ijq} + V_{ij}$$

where

$$(U, V) \sim N\left(0, \begin{bmatrix} 1 & \rho\sigma \\ \rho\sigma & \sigma^2 \end{bmatrix}\right)$$

We observe a step conditional on the probability of a jump exceeding a cutoff value, for example  $P_{ij} = 1(P_{ij}^* > 0.1)$  always, but observe the size of step  $P_{2ij}$  only when the step occurs i.e.,  $P_{ij} = 1$ . We use standard software to estimate the joint outcome – probability and size of step – in the Tobit II model (Tellis 1988).

## Online Appendix C: Fitting of SAW

We provide details on fitting of SAW:

### Fitting of SAW

Fitting SAW requires estimating a number of parameters. We use a maximum likelihood approach. Suppose we have observed  $n_i$  steps of technology  $i$  at times  $t_{i1}, \dots, t_{in_i}$ . Let  $J_i = (J_{i1}, \dots, J_{in_i})$  represent the series of observed steps and  $T_i = (T_{i1}, \dots, T_{in_i})$  be the times between these steps. In addition we assume covariates  $X_{ijk}$  and  $Y_{ijk}$  have been observed at times  $t_{ij}$ .

Conditional on  $\lambda_i$  and  $\omega$  the distribution of  $T_i$  is

$$f(T_i | \lambda_i, \omega) = \frac{1}{\Gamma(K)^{n_i}} \left( \prod_{j=1}^{n_i} \omega_{i(j-1)}^{-K} T_{ij}^{K-1} \right) \lambda_i^{-Kn_i} \exp \left( -\lambda_i^{-1} \sum_{j=1}^{n_i} \omega_{i(j-1)}^{-1} T_{ij} \right)$$

Similarly, the distribution of  $\lambda_i^{-1}$  conditional on  $\kappa$  and  $\omega$  is

$$f(\lambda_i^{-1} | \kappa, \theta) = \frac{\lambda_i^{-(\kappa-1)}}{\Gamma(\kappa)\theta^\kappa} \exp \left( \frac{-\lambda_i^{-1}}{\theta} \right)$$

Hence, the distribution of  $T_i$  conditional on  $\omega, \kappa, K$  and  $\theta$  is

(27)

$$f(T_i | \kappa, \theta, \omega, K) =$$

$$\int \frac{1}{\Gamma(K)^{n_i}} \left( \prod_{j=1}^{n_i} \omega_{i(j-1)}^{-K} T_{ij}^{K-1} \right) \lambda_i^{-Kn_i} \exp \left( -\lambda_i^{-1} \sum_{j=1}^{n_i} \omega_{i(j-1)}^{-1} T_{ij} \right) \frac{\lambda_i^{-(\kappa-1)}}{\Gamma(\kappa)\theta^\kappa} \exp \left( \frac{-\lambda_i^{-1}}{\theta} \right) d\lambda_i^{-1}$$

$$= \frac{\Gamma(Kn_i + \kappa)}{\Gamma(K)^{n_i} \Gamma(\kappa)} \left( \prod_{j=1}^{n_i} \theta^K T_{ij}^{K-1} \omega_{i(j-1)}^{-1} \right) \frac{1}{\left( 1 + \sum_{j=1}^{n_i} \theta \omega_{i(j-1)}^{-1} T_{ij} \right)^{\kappa + Kn_i}}$$

We can use Equation (27) to write down the log likelihood function,

$$(28) \quad l_T(\kappa, \theta, \beta, K) = \sum_{i=1}^N \log f(T_i | \kappa, \theta, \omega, K) = \sum_{i=1}^N \log \left( \frac{\Gamma(Kn_i + \kappa)}{\Gamma(K)^{n_i} \Gamma(\kappa)} \right) - \sum_{i=1}^N \sum_{j=1}^{n_i} \left( (1-K) \log(T_{ij}) + K(s_{j-1} + \beta_0 + \sum_{k=1}^p \beta_k X_{i(j-1)k}) \right) - \sum_{i=1}^N (\kappa + Kn_i) \log \left( 1 + \sum_{j=1}^{n_i} T_{ij} \exp(-s_{j-1} + \beta_0 + \sum_{k=1}^p \beta_k X_{i(j-1)k}) \right)$$

where  $\theta = \exp(-\beta_0)$ . Equation (28) is a convex function provided the  $n_i$ 's are large enough.

Hence standard optimization techniques can maximize Equation (28) in terms of  $\kappa$  and the  $\beta$ 's.

An analogous argument shows that the log likelihood function for the Step sub-model is

$$(29) \quad l_J(\rho, \eta, \alpha, M) = \sum_{i=1}^N \log f(J_i | \rho, \eta, \alpha, M) = \sum_{i=1}^N \log \left( \frac{\Gamma(Mn_i + \rho)}{\Gamma(M)^{n_i} \Gamma(\rho)} \right) - \sum_{i=1}^N \sum_{j=1}^{n_i} \left( (1-M) \log(J_{ij}) + M(rT_{ij} + \alpha_0 + \sum_{k=1}^q \alpha_k Y_{ijk}) \right) - \sum_{i=1}^N (\rho + Mn_i) \log \left( 1 + \sum_{j=1}^{n_i} J_{ij} \exp(-rT_{ij} + \alpha_0 + \sum_{k=1}^q \alpha_k Y_{ijk}) \right)$$

where  $\eta = \exp(-\alpha_0)$ , which can similarly be optimized by standard techniques. We calculate maximum likelihood estimates for all the parameters and produce future predictions using

Equations (8) and (9). Note that the joint log likelihood of both  $T$  and  $J$  is equal to,

$$\begin{aligned} l_{T,J}(\kappa, \theta, \beta, K, \rho, \eta, \alpha, M) &= \sum_{i=1}^N \log f(T_i, J_i | \kappa, \theta, \omega, K, \rho, \eta, \alpha, M) \\ &= l_T(\kappa, \theta, \beta, K) + l_J(\rho, \eta, \alpha, M). \end{aligned}$$

Hence, the joint likelihood is separable into the sum of the Wait and Step likelihoods.

### Comparison of one step and two step approaches to estimation

As a direct consequence the two step approach of maximizing the Wait and Step likelihoods

individually is mathematically identical to the one step approach of maximizing the joint SAW

likelihood. This is an advantage of the SAW model because it significantly reduces the fitting

procedure's complexity.
